1 ***Disrupted in Renal Carcinoma 3 (DIRC3) impacts malignant phenotype and***  
2 ***IGFBP5/IGF-1/Akt signaling axis in differentiated thyroid cancer.***

3

4 Short title: Role of *DIRC3* in thyroid cancer

5 Article category: Article

6

7 Piotr T. Wysocki<sup>1,2</sup>, Karol Czubak<sup>1</sup>, Anna A. Marusiak<sup>3</sup>, Monika Kolanowska<sup>4</sup>, Dominika  
8 Nowis<sup>1,5</sup>.

9

10 1. Laboratory of Experimental Medicine, Medical University of Warsaw, Nielubowicza 5, 02-  
11 097 Warsaw, Poland.

12 2. Department of Oncology, Medical University of Warsaw, Banacha 1A, 02-097 Warsaw,  
13 Poland.

14 3. Laboratory of Molecular OncoSignalling, IMol Polish Academy of Sciences, Flisa 6, 02-247  
15 Warsaw, Poland;

16 4. Warsaw Genomics INC, Łowicka 35, 02-502 Warsaw, Poland.

17 5. Department of Immunology, Medical University of Warsaw, Nielubowicza 5, 02-097  
18 Warsaw, Poland. Electronic address: [dominika.nowis@wum.edu.pl](mailto:dominika.nowis@wum.edu.pl)

19

20

21 Conflict of Interest: The authors declare no conflicts of interest.

22

23

24

25 Keywords: *DIRC3*, thyroid cancer, *IGFBP5*, IGF-1, invasiveness

26 Word count: 4500

27 List of abbreviations:

|    |                  |                                                     |
|----|------------------|-----------------------------------------------------|
| 28 | DTC              | differentiated thyroid cancers                      |
| 29 | cPTC             | conventional papillary thyroid cancer               |
| 30 | DEG              | differentially expressed gene                       |
| 31 | <i>DIRC3</i>     | <i>disrupted in renal carcinoma 3</i>               |
| 32 | ERK              | extracellular signal-regulated kinase               |
| 33 | FBS              | fetal bovine serum                                  |
| 34 | FOV              | field of view                                       |
| 35 | FTC              | follicular thyroid cancer                           |
| 36 | fvPTC            | follicular variant papillary thyroid cancer         |
| 37 | GO               | gene ontology                                       |
| 38 | GTE <sub>x</sub> | Genotype-Tissue Expression (project)                |
| 39 | GWAS             | genome-wide association study                       |
| 40 | HTC              | Hürthle cell thyroid cancer                         |
| 41 | IGF-1            | insulin-like growth factor 1                        |
| 42 | IGF-1R           | insulin-like growth factor 1 receptor               |
| 43 | <i>IGFBP5</i>    | <i>insulin-like growth factor binding protein 5</i> |
| 44 | lncRNA           | long non-coding RNA                                 |
| 45 | PTC              | papillary thyroid cancer                            |
| 46 | SD               | standard deviation                                  |
| 47 | SNP              | single nucleotide polymorphism                      |
| 48 | TCGA             | The Cancer Genome Atlas (project)                   |

49

50

51 **ABSTRACT**

52 Differentiated thyroid cancers (DTCs) are malignancies with ill-defined hereditary  
53 predisposition. Some germline variants influencing the risk of DTCs localize in *disrupted in*  
54 *renal carcinoma 3 (DIRC3)*, a poorly characterized long non-coding RNA (lncRNA) gene.  
55 Here, we characterized the function of *DIRC3* in DTCs. We established that *DIRC3* is  
56 downregulated in DTCs, and its high expression may reduce the risk of cancer recurrence in  
57 patients. *DIRC3* transcripts were enriched in cell nuclei *in vitro*, where they upregulated *insulin-*  
58 *like growth factor binding protein 5 (IGFBP5)*, a gene known to modulate the cellular response  
59 to insulin-like growth factor 1 (IGF-1). Silencing of *DIRC3* in thyroid cancer cell lines produced  
60 a phenotypic dichotomy: it augmented cell migration and invasiveness, reduced apoptosis, but  
61 abrogated the MTT reduction rate. We demonstrated that the pro-migratory phenotype was  
62 produced by the downregulation of *IGFBP5*. Transcriptomic profiling confirmed a functional  
63 redundancy in the activities of *DIRC3* and *IGFBP5*. Moreover, downregulation of *DIRC3*  
64 enhanced the susceptibility of cancer cells to IGF-1 stimulation and promoted Akt signaling. In  
65 conclusion, *DIRC3* expression alters the phenotype of thyroid cancer cells and modulates the  
66 activity of IGF1/IGFBP5/Akt axis. We propose an interplay between *DIRC3* and IGF signaling  
67 as a mechanism that promotes thyroid carcinogenesis.

68

69

70

71

72

73

74

75

76

77

78

79

## 80 INTRODUCTION

81 Thyroid cancer is the most common malignancy of endocrine glands.<sup>1</sup> More than 95% of  
82 thyroid cancers originate from follicular epithelial cells.<sup>2</sup> The current 4th World Health  
83 Organization Classification of Tumours of Endocrine Organs divides follicular cell-derived  
84 thyroid cancers into five entities: papillary (PTC), follicular (FTC), Hürthle cell (HTC), poorly  
85 differentiated, and anaplastic carcinomas. PTC, FTC and HTC retain a significant degree of  
86 cytological follicular differentiation and have a favorable prognosis. Accordingly, these three  
87 cancer types are jointly termed “differentiated thyroid cancer” (DTC).<sup>2</sup>

88 Contribution of hereditary factors to the pathogenesis of DTCs is one of the highest among all  
89 cancer types.<sup>3,4</sup> Pedigree studies demonstrate three- to nine-fold increase in thyroid cancer risk  
90 in the first-degree relatives of DTC patients.<sup>3-5</sup> Furthermore, a recent pan-cancer study has  
91 indicated that thyroid cancers have the second highest heritability estimate among 18 common  
92 malignancies.<sup>6</sup> Some insights into the mechanism of this hereditary predisposition have been  
93 provided by genome-wide association studies (GWAS).

94 At least seven GWAS have been performed in DTCs to date.<sup>7-11</sup> These efforts have identified  
95 at least 10 chromosomal loci modulating the risk of thyroid cancer in the Caucasians. Four loci  
96 (14q13.3, 9q22.33, 8q12 and 2q35) contain germline variants demonstrating particularly robust  
97 associations and good cross-study replicability in European, American and Asian populations.<sup>7-</sup>  
98 <sup>11</sup> Numerous single nucleotide polymorphisms (SNPs) associated with the risk of thyroid  
99 cancers locate in the chromosome 2q35 in *disrupted in renal carcinoma 3 (DIRC3)*, a poorly  
100 characterized long non-coding RNA (lncRNA) gene. *DIRC3* variants present some of the  
101 strongest associations with DTC incidence across ethnically diverse populations.<sup>7-9, 12-14</sup>  
102 Additionally, one of the SNPs in *DIRC3*, rs996423, has been shown to influence the overall  
103 mortality in DTC patients.<sup>15</sup>

104 While the associations between *DIRC3* germline variants and the thyroid cancer risk have been  
105 robustly documented, the function of *DIRC3* in DTCs has not been established so far.  
106 Henceforth, we evaluated the role of *DIRC3* in the clinical and phenotypic presentation of  
107 DTCs.

108

109

110

## 111 RESULTS

112

### 113 ***DIRC3* expression in public RNA-seq datasets**

114 Evaluation of publicly available RNA-sequencing datasets (the Genotype-Tissue Expression  
115 data [GTEx] for normal tissue, and The Cancer Genome Atlas [TCGA] for cancers<sup>16, 17</sup>)  
116 revealed that *DIRC3* is expressed in normal thyroid tissue and PTCs (Figure 1A and Supp.  
117 Figure 1). Using a best fitting threshold of *DIRC3* expression to discriminate the disease-free  
118 status, we classified PTCs as either *DIRC3-high* or *DIRC3-low* tumors. Survival analysis  
119 indicated that elevated expression of *DIRC3* associated with a significantly longer disease free-  
120 survival (Figure 1B and 1C). A similar trend was observed for the overall survival (Supp. Figure  
121 2). Histological make-up of *DIRC3-high* and *DIRC3-low* groups was dissimilar: *DIRC3-high*  
122 carcinomas were enriched for conventional PTCs (81.9% and 67.3% in *DIRC3-high* and  
123 *DIRC3-low* groups, respectively), but depleted of the follicular (12.6% and 23.1%,  
124 respectively) and tall-cell PTC variants (2.4% and 8.9%, respectively). Likewise, the prevalence  
125 of tumor-driving mutations was divergent in the expression groups (Supp. Figure 3).

126 TCGA data was used to evaluate correlations between the level of *DIRC3* lncRNA and  
127 expression of other genes (Supp. Table 1). *DIRC3* was most strongly co-expressed with *insulin-*  
128 *like growth factor binding protein 5, IGFBP5* (Spearman coefficient = 0.79), a gene located on  
129 the chromosome 2 approximately 570 000 base pairs downstream from *DIRC3* (Figure 1D).

130

### 131 ***DIRC3* expression in thyroid tissue**

132 We analyzed the expression of *DIRC3* and *IGFBP5* in 67 DTC and normal thyroid tissue pairs  
133 (clinical data shown in Supp. Table 2). *DIRC3* was significantly downregulated in DTCs  
134 compared to the patient-matched normal thyroid tissue specimens (Figure 2A). Moreover, the  
135 strong co-expression of *DIRC3* and *IGFBP5* was confirmed (Figure 2B). This outcome  
136 suggested that *DIRC3* could play some role in the transcriptomic regulation of *IGFBP5*, a gene  
137 prominently involved in the modulation of insulin-like growth factor (IGF) signaling.

138 The expression of *DIRC3* was analyzed in the context of patients' clinicopathological data  
139 (Figure 2C). Histological cancer type, invasion of thyroid capsule, node metastasis, or vascular  
140 invasion did not associate with the level of *DIRC3* lncRNA. On the other hand, *DIRC3*  
141 expression was lower in primary DTCs that developed distant metastasis. Separate analysis  
142 performed for conventional PTCs (cPTCs) did not identify significant interactions between

143 *DIRC3* expression and clinicopathological features (Supp. Figure 4). No separate evaluations  
144 were attainable for other histological types due to their limited representation in our material.

145

#### 146 ***DIRC3* expression in cancer cell lines**

147 GTEx data revealed that *DIRC3* has four main splice variants (Supp. Figure 5). Only two splice  
148 variants are prominently expressed across all tissue types evaluated in GTEx. The longer splice  
149 variant is annotated as ENST00000474063.5 (*DIRC3-202* in Ensembl), and the shorter splice  
150 variant is ENST00000484635.1 (*DIRC3-203*). Two other annotated splice variants do not  
151 exhibit expression in thyroid in the GTEx data: ENST00000486365.5 (*DIRC3-204*) and  
152 ENST00000423123.1 (*DIRC3-201*).

153 The expression of *DIRC3* and *IGFBP5* was evaluated in five cancer cell lines: K1, MDA-T32,  
154 MDA-T68, MDA-T120 (PTC cell lines) and MCF-7 (breast cancer cell line). We included  
155 MCF-7 due to previously reported associations of SNPs in *DIRC3* with the breast cancer risk<sup>18</sup>,  
156 <sup>19</sup>, and a relatively high expression of *DIRC3* in our preliminary experiments. The highest  
157 expression of *DIRC3* and *IGFBP5* was observed in MDA-T32 and MCF-7, while *DIRC3* was  
158 not expressed in MDA-T68 (Figure 3A). We confirmed expression of *DIRC3-202* and *DIRC3-*  
159 *203* splice variants, and the absence of *DIRC3-204* in all tested cell lines. Subcellular  
160 fractionation of RNA showed that *DIRC3* transcripts localized preferentially in the nuclear  
161 fraction (Figure 3B).

162 We used *DIRC3*-targeting antisense oligonucleotides to silence *DIRC3* expression in four cell  
163 lines (Figure 3C and Supp. Figure 6). Two GapmeRs (anti-*DIRC3*-common\_2 and anti-*DIRC3-*  
164 common\_3) were designed to silence both expressed splice variants (*DIRC3-202* and *DIRC3-*  
165 *203*). Additionally, another GapmeR (anti-*DIRC3-202*) targeting only the longer splice variant  
166 was used to test the phenotypic effects of selective silencing of this transcript. *DIRC3*-targeting  
167 GapmeRs successfully downregulated their direct targets. Importantly, silencing of *DIRC3* also  
168 downregulated *IGFBP5* in the cell lines that expressed *DIRC3* (MDA-T32, MDA-T120 and  
169 MCF-7). Interestingly, GapmeR anti-*DIRC3-202* successfully silenced *DIRC3-202*, however  
170 this downregulation did not influence *IGFBP5*. Finally, *DIRC3*-targeting GapmeRs did not  
171 influence *IGFBP5* expression in MDA-T68, the cell line not expressing *DIRC3* (Figure 3). This  
172 result proved that *IGFBP5* downregulation was directly related to the *DIRC3*-targeting  
173 capabilities of the GapmeRs.

174

## 175 **Phenotypic impact of *DIRC3* silencing**

176 The phenotypic effects of *DIRC3* silencing were evaluated in MDA-T32 and MDA-T120 cell  
177 lines. We utilized MTT assays to indirectly quantify the cell proliferation and viability.  
178 Downregulation of *DIRC3* modestly restrained the MTT reduction rate in MDA-T32, while a  
179 prominent inhibitory effect was observed in MDA-T120 (Figure 4A). Interestingly, no such  
180 result was observed when *DIRC3-202* was silenced selectively. This outcome might indicate  
181 different biological and transcriptomic activities of *DIRC3* splice variants.

182 Downregulation of *DIRC3* markedly increased migration and invasiveness of MDA-T32 and  
183 MDA-T120 cell lines in the Transwell assays (Figure 4B & 4C). Similarly, silencing of *DIRC3*  
184 in MDA-T32 cells significantly promoted their chemotaxis to IGF-1 (Figure 4D). IGF-1 alone  
185 was insufficient to generate a chemotactic response in MDA-T120 (not shown).

186 We tested if the alterations in *DIRC3* expression impact the apoptosis susceptibility of cancer  
187 cells deprived of serum and L-glutamine. A luminescent assay indicated that silencing of  
188 *DIRC3* reduced the activity of caspase 3/7 in starved MDA-T120 and MDA-T32 cells (Figure  
189 4E).

190 Silencing of *DIRC3* did not influence the anchorage-independent growth capabilities of MDA-  
191 T32 cells (Figure 4F and Supp. Figure 7). MDA-T120 cell line generated only a limited number  
192 of visible colonies in soft agar thus preventing its use in the assay.

193

## 194 ***IGFBP5* rescue experiments**

195 We used rescue experiments involving *IGFBP5* to establish whether phenotypic effects induced  
196 by *DIRC3* silencing were related to the transcriptomic regulation of *IGFBP5*. For this purpose,  
197 two MDA-T32 derivatives with stable transgene expression were generated: cells expressing  
198 pcDNA3-IGFBP5-V5 plasmid, and cells transfected with an empty pcDNA3 vector (a negative  
199 control).

200 Both modified cell lines were transfected with the *DIRC3*-targeting GapmeR (Figure 5A).  
201 Introduction of pcDNA3-IGFBP5-V5 to MDA-T32 resulted in a strong upregulation of  
202 *IGFBP5*. Transfection of anti-*DIRC3*-common\_3 downregulated *DIRC3* in both plasmid-  
203 overexpressing cell lines. Nevertheless, this procedure significantly downregulated *IGFBP5*  
204 only in the cells transfected with the control plasmid (Figure 5A). This outcome indicated that  
205 the *DIRC3*-targeting GapmeR could influence *IGFBP5* expression only when the transcripts

206 were produced from the nuclear locus. Besides, pcDNA3-IGFBP5-V5 modestly upregulated  
207 the expression of *DIRC3*.

208 Plasmid-transfected MDA-T32 cells were tested in MTT and Transwell assays. *DIRC3*  
209 silencing significantly reduced the MTT conversion rate in both plasmid-expressing cell  
210 derivatives (Figure 5B). In contrast, overexpression of *IGFBP5* successfully negated the pro-  
211 migratory phenotype generated by *DIRC3* silencing (Figure 5C and 5D). These results  
212 suggested that the phenotypic effects produced by *DIRC3* could be either *IGFBP5*-dependent  
213 (in regards to the migratory potential), or at least partially independent from *IGFBP5* (as in  
214 MTT assays).

215

### 216 **Transcriptomic alterations induced by *DIRC3* silencing**

217 We used RNA-seq to evaluate transcriptomic changes related to the silencing of *DIRC3* or  
218 *IGFBP5* in MDA-T32. Efficient gene downregulation was confirmed using qRT-PCR (Supp.  
219 Figure 8). As expected, *DIRC3* silencing reduced the abundance of *IGFBP5* transcripts.  
220 Interestingly, the knockdown of *IGFBP5* also downregulated *DIRC3*. This observation was in  
221 line with the outcomes of *IGFBP5* overexpression experiment, in which *IGFBP5* upregulated  
222 *DIRC3*. Accordingly, a bidirectional positive feedback mechanism between *DIRC3* and  
223 *IGFBP5* may be proposed.

224 RNA-seq was performed in biological triplicates for each set-up (the primary component  
225 analysis shown in Supp. Figure 9). Silencing of *DIRC3* revealed 198 differentially expressed  
226 genes (DEGs), while silencing of *IGFBP5* resulted in 631 DEGs. Heatmaps of top 30 DEGs in  
227 *DIRC3*-silenced and *IGFBP5*-silenced groups, and corresponding volcano plots are shown in  
228 Figure 6A and Supp. Figure 10, respectively. Gene overlap between the *DIRC3*- and *IGFBP5*-  
229 regulated DEGs was significant and comprised of 58 genes (Figure 6B). Directions of the  
230 expression changes were concordant for all shared DEGs. Review of literature revealed that  
231 many of the shared DEGs have been previously implicated in thyroid carcinogenesis, e.g.,  
232 *metastasis associated lung adenocarcinoma transcript 1 (MALAT1)*, *matrix metalloproteinase-*  
233 *1 (MMP-1)*, *cyclin dependent kinase inhibitor 1A (CDKN1A)* and *stanniocalcin 1 (STC1)* (Supp.  
234 Table 3).

235 The gene ontology (GO) analysis indicated that genes involved in the “negative regulation of  
236 cell migration” (GO:0030336) were most significantly affected by the knockdown of *DIRC3*



237 (Figure 6C). Other GO terms significantly altered included: “signal transduction”  
238 (GO:0007165), “cell proliferation” (GO:0008283), “response to growth hormone”  
239 (GO:0060416), “positive regulation of protein phosphorylation” (GO:0001934). *IGFBP5* is  
240 assigned to 29 GO terms in The Gene Ontology Annotation Database. Several of these terms  
241 were among the most significantly altered by *DIRC3* silencing (e.g., GO:0030336~negative  
242 regulation of cell migration, GO:0007165~signal transduction, GO:0071320~cellular response  
243 to cAMP).

244

### 245 **Effect of *DIRC3* silencing on IGF signaling**

246 Since *DIRC3* modulated the expression of *IGFBP5*, we hypothesized that *DIRC3* could impact  
247 IGF signaling. Silencing of *DIRC3* or *IGFBP5* in MDA-T32 cells downregulated the release of  
248 IGFBP5 into medium containing IGF-1 (Figure 6D). We harvested the conditioned media and  
249 starved cells for 12 h. Stimulation of the starved cells with their original conditioned medium  
250 induced phosphorylation of IGF-1 receptor (IGF-1R) and Protein kinase B (Akt; Figure 6E and  
251 6F). The positive influence on pAkt level was significantly stronger in the cells transfected with  
252 either *DIRC3*- or *IGFBP5*- targeting GapmeRs (i.e. when the conditioned medium contained  
253 less IGFBP5). Phosphorylation of Akt was further increased when the conditioned media was  
254 enhanced with additional IGF-1. On the other hand, supplementation of recombinant IGFBP5  
255 protein prevented phosphorylation of IGF-1R and Akt. These outcomes indicated that the strong  
256 phosphorylation of Akt observed after silencing of *DIRC3* was triggered by the stimulatory  
257 effect of IGF-1 and reduced amount of IGFBP5 in the medium. In contrast, extracellular signal-  
258 regulated kinase (ERK) was robustly phosphorylated in all samples since MDA-T32 harbors  
259 *BRAF* V600E mutation (typical for cPTC). In conclusion, downregulation of *DIRC3* influenced  
260 response to IGF-1 and promoted Akt signaling in thyroid cancer cells. A hypothetical  
261 mechanistic model is shown in Supp. Figure 11.

262

## 263 **DISCUSSION**

264 This study is the first to report that *DIRC3* is functionally implicated in thyroid carcinogenesis.  
265 We demonstrate that *DIRC3* is downregulated in DTCs, and its low expression may increase  
266 the risk of cancer recurrence. Silencing of *DIRC3* in thyroid cancer cells augmented their  
267 invasiveness, curtailed production of IGFBP5 and boosted Akt signaling upon IGF-1  
268 stimulation. Transcriptomic profiling performed in cells experiencing knockdown of either

269 *DIRC3* or *IGFBP5* indicated a significant redundancy in the activities of both genes. Shared  
270 and upregulated DEGs included many genes previously implicated in thyroid tumorigenesis,  
271 e.g., *MALAT1*, *CDKN1A* and *MMP-1*.<sup>20-22</sup> *DIRC3* silencing also upregulated *STC1*, which  
272 encodes stanniocalcin 1, a potent inhibitor of pregnancy-associated plasma protein -A and -A2  
273 (PAPP-A and PAPP-A2).<sup>23</sup> PAPP-A and PAPP-A2 possess proteolytic activities towards  
274 *IGFBP5*. Stanniocalcin 1 thus prevents the release of IGF-1 from IGF/IGFBP complexes and  
275 downregulates IGF signaling.<sup>23</sup> Upregulation of *STC1* may constitute a negative feedback  
276 mechanism triggered by the knockdown of *DIRC3* or *IGFBP5*. *STC1* also acts as an oncogene  
277 promoting proliferation of thyroid cancer cells.<sup>23, 24</sup>

278 *DIRC3* was originally described as a gene participating in t(2;3)(q35;q21) translocation in  
279 familial renal cell cancers, however, its function was not evaluated in the report.<sup>25</sup> Critical  
280 evidence implicating *DIRC3* in carcinogenesis has been provided by GWAS. Germline variants  
281 in *DIRC3* were found to influence the hereditary risk of estrogen receptor-positive breast  
282 cancers.<sup>6, 18, 19</sup> Certain breast cancer risk variants located in the chromosome 2q35 (in the  
283 proximity or within *DIRC3* locus) were mapped to putative regulatory elements (PREs) bound  
284 by estrogen receptor (ER $\alpha$ ) and forkhead box A1 (FOXA1) transcription factors. Some of these  
285 PREs were found to act as enhancers that physically interact with the *IGFBP5* locus to regulate  
286 its expression.<sup>26, 27</sup>

287 Numerous germline variants in *DIRC3* have been associated with the risk of DTCs (rs966423,  
288 rs6759952, rs12990503, rs16857609, rs11693806 and rs772695095).<sup>6, 8, 9, 13, 28, 29</sup> Guibon *et al.*  
289 have recently performed fine-mapping analysis of the *DIRC3* locus.<sup>14</sup> This project replicated  
290 some of the previously reported risk SNPs and identified two novel risk variants (rs57481445  
291 and rs3821098). Colocalization analysis highlighted three additional SNPs in *DIRC3*, which  
292 were found to constitute *expression quantitative trait loci* associated with the downregulation  
293 of *DIRC3* and *IGFBP5* in thyroid tissue. The strongest effect size was observed for rs12990503,  
294 the variant previously associated with increased risk of thyroid and breast cancers.<sup>14, 29</sup>

295 Coe *et al.* have recently demonstrated that two transcription factors critical in melanomagenesis,  
296 melanocyte inducing transcription factor (MITF) and SRY-related HMG-box 10 (SOX10),  
297 colocalize to two PREs in the *DIRC3* locus and suppress *DIRC3* expression.<sup>30</sup> Since *DIRC3*  
298 and *IGFBP5* were located in a common topological domain, the authors hypothesized that both  
299 genes could be transcriptomically related. Indeed, silencing of *DIRC3* downregulated *IGFBP5*  
300 expression in melanoma cell lines and promoted their anchorage-independent growth. While  
301 the results of the melanoma study support our discoveries, it is important to stress differences.

302 Firstly, while Coe *et al.* observed that suppression of *DIRC3* promoted the anchorage-  
303 independent growth, no changes in the proliferation and migration of melanoma cells were  
304 detected.<sup>30, 31</sup> This outcome contrasts our observations. Additionally, overexpression of  
305 *IGFBP5* in melanoma was previously shown to inhibit cell proliferation, anchorage-  
306 independent growth, migration and invasiveness *in vitro*, and reduce the melanoma growth and  
307 pulmonary metastasis *in vivo*. Conversely, silencing of *IGFBP5* in melanoma produced tumor-  
308 promoting effects.<sup>32</sup> Secondly, the mechanistic model offered in melanoma may not hold true  
309 for thyroid cancers, since SOX10 and MITF are not expressed in normal thyroid and DTCs (as  
310 indicated by the GTEx and TCGA data). Thirdly, SNPs modulating the incidence of DTCs do  
311 not overlap PREs reported in the melanoma study. This suggests that these variants are very  
312 unlikely to impact functions of SOX10 and MITF. Fourthly, we observed that selective  
313 silencing of *DIRC3-202* did not influence *IGFBP5* expression. Interestingly, the sequence of  
314 our GapmeR anti-*DIRC3-202* was almost identical to the sequence of a GapmeRs used in the  
315 melanoma study. This particular GapmeR efficiently downregulated *IGFBP5* in melanoma cell  
316 lines. We presume that this inconsistency might indicate dissimilarities in the functions of  
317 *DIRC3* splice variants across various malignancies.

318 IGF signaling is strongly involved in carcinogenesis due to its pro-mitogenic, pro-invasive and  
319 anti-apoptotic roles. Its tumor-driving impact has also been recognized in DTCs.<sup>33, 34</sup> The  
320 prospective UK Biobank study of 30 cancer types has recently reported that the concentration  
321 of IGF-1 in human serum was most strongly positively associated with the incidence of DTCs.<sup>35</sup>  
322 Interestingly, several *DIRC3* SNPs associate with human height, the anthropometric parameter  
323 driven directly by IGF-1.<sup>36, 37</sup> Given the strong positive association between body height and  
324 thyroid cancer risk, a common molecular mechanism driving both conditions may be  
325 presumed.<sup>38, 39</sup> We propose that the epidemiological data associating human height with the  
326 incidence of DTCs can be at least partially explained by shared hereditary variants in *DIRC3*  
327 and their modulatory influence on the cellular response to IGF-1.

328 In the classical paradigm, *IGFBP5* inhibits IGF signaling by preventing binding of IGF-1 to  
329 IGF-1R.<sup>40</sup> Nevertheless, some studies demonstrate that *IGFBP5* may promote IGF signaling in  
330 specific cellular and tissue contexts. The ultimate phenotypic influence of *IGFBP5* is dependent  
331 on the bioavailability of IGF-1, abundance of *IGFBP*-degrading proteases, and the composition  
332 of extracellular matrix.<sup>40</sup> Accordingly, *IGFBP5* may produce diverse biological effects.  
333 *IGFBP5* has been reported to act as either oncogene or tumor suppressor in different cancer  
334 studies, with some evidence indicating its pro-proliferative role in PTC.<sup>40-42</sup> Results of our study

335 designate *DIRC3* as functionally dichotomous gene, with its silencing boosting migration and  
336 invasiveness of cancer cells, but decreasing the MTT conversion rate (the indirect indicator of  
337 cell proliferation). We show that these phenotypic alterations may be either *IGFBP5*-dependent  
338 (changes in the migratory potential) or *IGFBP5*-independent (the effects observed in MTT  
339 assays). Accordingly, this functional dichotomy of *DIRC3* may echo the multifaceted  
340 phenotypic influence of *IGFBP5*, as well as correspond to some hypothetical *IGFBP5*-  
341 independent activities.

342 Our study has some limitations. Since the number of analyzed DTC samples was relatively  
343 small, our clinical observations should be validated. Additionally, it is possible that our  
344 discoveries may hold true only for certain histological types of DTCs, principally PTCs.  
345 Moreover, we were unable to perform successful *DIRC3* overexpression experiments. While  
346 CRISPR activation (CRISPRa) was expected to recapitulate the endogenous expression of  
347 *DIRC3* more faithfully than the plasmid-mediated overexpression (which failed to produce  
348 biological effects in melanoma),<sup>30</sup> our CRISPRa experiments were unsuccessful in upregulating  
349 *DIRC3* and *IGFBP5*. Future studies should also evaluate the role of *DIRC3* *in vivo*.

350 Our discoveries may be clinically relevant. Firstly, expression of *DIRC3* in thyroid carcinomas  
351 may have a prognostic value, and the analysis of *DIRC3* level in thyroid tumors might help to  
352 guide medical decision (e.g., to deescalate treatment of low-risk/*DIRC3-high* cancers).  
353 Secondly, we demonstrate that downregulation of *DIRC3* increases the cellular response to  
354 IGF-1. Therapeutic inhibition of IGF signaling has been long pursued in clinical oncology.<sup>43,44</sup>  
355 While results of early studies of IGF-1R inhibitors were promising (with some trials enrolling  
356 DTC patients), outcomes of phase II/III clinical trials have been largely disappointing. Still,  
357 some exceptional responders were observed. It has been proposed that novel predictive factors  
358 are necessary to identify patients who could respond to IGF-1R inhibitors.<sup>43,44</sup> Remarkably, the  
359 level of *IGFBP5* in tumors correlated inversely with the resistance to IGF-1R inhibition in  
360 breast, colon and bladder carcinomas.<sup>45-47</sup> Accordingly, our results may provide rationale for  
361 evaluating IGF-1R inhibitors in DTCs that downregulate *DIRC3*.

362 In summary, our study indicates that *DIRC3* has a prominent anti-invasive role in thyroid  
363 cancers. *DIRC3* modulates the expression of *IGFBP5*, and hence it regulates IGF-1/Akt  
364 signaling. The expression of *DIRC3* in thyroid cancers may emerge as a clinically relevant  
365 prognostic factor and a predictive marker for novel therapeutic strategies.

366

## 367 MATERIALS AND METHODS

368

### 369 Clinical material

370 67 patient-matched DTC and normal thyroid tissue pairs were collected at the Medical  
371 University of Warsaw (Poland). Collection of tissue was approved by the Institutional Review  
372 Board. Informed consents were obtained from patients. RNA was extracted from fresh frozen  
373 tissue using TRIzol (Thermo Fisher, Waltham, MA, USA).

### 374 Quantitative reverse transcriptase real-time PCR (qRT-PCR)

375 Reverse transcription was performed using the Moloney Murine Leukemia Virus Reverse  
376 Transcriptase (Promega, Madison, WI, USA), 1000 ng of total RNA and random hexamers.  
377 LightCycler 480 SYBR Green I Master Mix (Roche, Mannheim, Germany) was combined with  
378 diluted cDNA, and forward and reverse primers (0.4  $\mu$ M final, each; Supp. Table 4). Reactions  
379 were performed in technical triplicates in LightCycler 480 II system (Roche). Relative gene  
380 expression was calculated using the  $2^{-\Delta\Delta C_t}$  method employing *hypoxanthine*  
381 *phosphoribosyltransferase 1 (HPRT1)* as the housekeeping gene.

### 382 Bioinformatics databases

383 Gene expression was evaluated in public RNA sequencing data from: the Genotype-Tissue  
384 Expression project for normal tissue (<https://gtexportal.org/home/>), and The Cancer Genome  
385 Atlas for malignant tissue (accessed via cBioPortal; <https://www.cbioportal.org/>).

### 386 Cell lines

387 MDA-T32 (RRID:CVCL\_W913), MDA-T120 (RRID:CVCL\_QW85; both conventional  
388 PTC), MDA-T68 (RRID:CVCL\_QW83; follicular variant of PTC), and MCF-7  
389 (RRID:CVCL\_0031; breast cancer) cell lines were obtained from American Type Culture  
390 Collection (Manassas, VA, USA). K1 (RRID:CVCL\_2537; conventional PTC) was obtained  
391 from Sigma-Aldrich (St. Louis, MO, UK). MDA-T32, MDA-T68 and MDA-T120 cells were  
392 cultured in RPMI-1640 (ATCC modification; Gibco, Paisley, UK). K1 was cultured using a  
393 mix of DMEM, Ham's F12 (both Gibco, Grand Island, NY, USA) and MCDB-105 (Cell  
394 Applications, San Diego, CA, USA; ratio 2:1:1). Culture media were supplemented with 10%  
395 fetal bovine serum (FBS; Euroclone, Pero, Italy), 2 mM L-glutamine (Lonza, Walkersville,  
396 MD, USA), Penicillin-Streptomycin (Sigma-Aldrich), and MEM NEAA solution (Gibco;

397 added only to RPMI-1640). Cultures were periodically tested for mycoplasma. Total RNA was  
398 extracted using the GeneMATRIX Universal RNA Purification Kit (EURx, Gdansk, Poland).

### 399 **Subcellular RNA fractionation**

400 RNA fractionation of MDA-T32 and MCF-7 cells was performed using the Nuclei EZ lysis  
401 buffer (Sigma-Aldrich) as previously described.<sup>48</sup> RNA was isolated from the nuclear and  
402 cytoplasmic cell fractions using RNA Extracol and GeneMATRIX Universal RNA Purification  
403 Kit (EURx). qRT-PCR was performed for each RNA fraction. The relative subcellular location  
404 of transcripts was estimated by calculating differences in the cycle-threshold values obtained  
405 for equal input (1000 ng) of nuclear and cytoplasmic RNA. *MALAT1* and *small nucleolar RNA*  
406 *host gene 5 (SNHG5)* were used as nuclear and cytoplasmic control lncRNAs, respectively.  
407 Experiments were repeated three times.

### 408 **Gene silencing**

409 Cells were plated in 6-well plates 24 h before transfections ( $3 \times 10^5$  cells/well for MDA-T32,  
410 MDA-T68, K1 and MCF-7;  $4 \times 10^5$  cells/well for MDA-T120). GapmeRs (Qiagen, Hilden,  
411 Germany; 50 nM) were transfected using Lipofectamine 2000 (Thermo Fisher). Sequences of  
412 GapmeRs are provided in Supp. Table 5. In MTT assays transfections were performed directly  
413 in 96-well plates.

### 414 **Migration and invasiveness**

415 Cells were tested using 8.0  $\mu\text{m}$  pore Transwell chambers placed in 24-well plates (uncoated or  
416 Matrigel-coated inserts; Corning, Bedford, MA, USA). Cells were cultured for 48 h after  
417 transfections, serum-starved for another 24 h, dissociated using the Non-enzymatic Cell  
418 Dissociation Solution (Sigma-Aldrich), centrifuged, and re-suspended in serum-free medium.  
419  $5 \times 10^4$  viable cells were applied to the upper compartments of inserts, while the lower  
420 compartments were filled with complete culture medium (10% FBS). Inserts were fixed with  
421 4% paraformaldehyde after 22 h of culture, stained with 0.05% crystal violet, and rinsed with  
422 water. Upper surfaces of the insert membranes were cleansed with cotton swabs. Membranes  
423 were visualized (40x magnification), and at least 5 random fields of view were photographed  
424 in each insert. The IGF-1 chemotaxis assays were performed identically, except the serum-  
425 starvation step was omitted, and the lower compartments of chambers were filled with serum-  
426 free RPMI-1640 medium containing IGF-1 (100 ng/ml; Gibco). Each experiment was repeated  
427 at least three times.

428 **MTT assay**

429 Cells were plated in 96-well plates (3 300 and 5 000 cells/well for MDA-T32 and MDA-T120,  
430 respectively) and transfected with GapmeRs. Culture medium was replaced with 100  $\mu$ l  
431 OptiMEM (Gibco) immediately before testing. 10  $\mu$ l of MTT solution (12 mM; Sigma-Aldrich)  
432 was added to the wells and incubated for 4 h. 100  $\mu$ L of dissolving solution (0.1 g/ml SDS in  
433 0.01 M HCl; Thermo Fisher, Rockford, IL, USA) was added to each well. The optical density  
434 was measured spectrophotometrically at 560 nm (Glomax microplate reader, Promega) after 10  
435 h of incubation. Experiments were performed with technical quadruplicates and repeated three  
436 times.

437 **Apoptosis assay**

438 MDA-T32 and MDA-T120 cells were transfected in 96-well microplates and cultured in  
439 complete RPMI-1640 medium for 72 h. Confluent cells were starved in L-glutamine- and  
440 serum-free DMEM medium (Gibco) for 24 h. Caspase-Glo 3/7 assay (Promega) was used  
441 according to the manufacturer's manual. Measurements were made using Glomax microplate  
442 reader (Promega). The final luminescence values were expressed as a ratio between the  
443 luminescence of samples and blanks (filled with DMEM). Experiments were repeated three  
444 times with technical duplicates.

445 **Soft agar assay**

446 SeaPlaque agarose (Lonza, Rockland, ME, USA) was mixed with complete RPMI-1640  
447 medium to produce 0.8% base agarose layers in 6-well plates. MDA-T32 and MDA-T120 cells  
448 were transfected, cultured for 48 h, re-suspended in complete medium, and mixed with liquid  
449 agarose. 1 ml of this suspension ( $1 \times 10^4$  cells in 0.42% agarose) was applied to the agarose-  
450 coated wells. The upper agarose layer was covered with 1 ml of complete RPMI-1640 medium  
451 (replaced every 5 days). Cells were cultured for 16 (MDA-T32) or 21 days (MDA-T120). Gels  
452 were stained with 0.005% crystal violet in 10% ethanol, and photographed. Colonies were  
453 counted using ImageJ (NIH, VA, USA). Assays were repeated three times with technical  
454 triplicates.

455 **RNA sequencing**

456 Total RNA was isolated from MDA-T32 cells 72 h after GapmeR transfections (anti-*DIRC3*-  
457 common\_3, anti-*IGFBP5*, or negative control; all in triplicates). All steps of RNA-seq  
458 workflow were performed by GENEWIZ (Leipzig, Germany; see Supplementary Methods and

459 Supp. Table 6). Differential gene expression was determined using DESeq2.<sup>49</sup> Gene ontology  
460 analysis was performed using GeneSCF.<sup>50</sup>

#### 461 **Stable overexpression of *IGFBP5***

462 pcDNA3-IGFBP5-V5 plasmid was a gift from Steven Johnson (Addgene plasmid #11608;  
463 <http://n2t.net/addgene:11608>; RRID: Addgene\_11608). pcDNA3 plasmid (Invitrogen,  
464 Carlsbad, CA, USA) was used as a control vector. Plasmid transfections were performed in  
465 MDA-T32 cell line using Fugene 6 (Promega). Transfected cells were cultured for over 3 weeks  
466 in complete RPMI-1640 medium containing G418 (600 µg/ml; Clontech, Palo Alto, CA, USA)  
467 to select resistant clones.

#### 468 **IGF-1 stimulation and Western blotting**

469 MDA-T32 cells were transfected with GapmeRs, cultured in complete RPMI-1640 medium for  
470 72 h, and then in serum-free RPMI-1640 containing IGF-1 (20 ng/ml; Gibco) for another 24 h.  
471 Next, the conditioned medium was collected and stored at 4 °C, while the cells were serum- and  
472 IGF-1-starved for another 12 h. Finally, cells were stimulated for 10 minutes with the  
473 conditioned media, each prepared in three versions: a) unmodified, b) enhanced with IGF-1  
474 (extra 30 ng/ml), or c) supplemented with recombinant human IGFBP5 protein (500 ng/ml;  
475 Peprotech, Rocky Hill, NJ, USA). Cell lysates were obtained using RIPA buffer with the Halt  
476 Protease and Phosphatase Inhibitor Cocktail (Thermo Fisher, Rockford, IL, USA). The  
477 conditioned media (1.8 ml) collected in parallel experiments were concentrated using Pierce  
478 Protein Concentrator PES, 10K MWCO (Thermo Fisher) and mixed with the RIPA and  
479 Inhibitor Cocktail buffer. Electrophoresis was performed using 10% Mini-PROTEAN TGX gel  
480 (10 µg of protein per lane). Proteins were transferred to PVDF membranes (both Bio-Rad,  
481 Hercules, CA, USA). Membranes were rinsed, blocked with non-fat dry milk, incubated with  
482 primary antibodies (Supp. Table 7; 4 °C, overnight), rinsed, and probed with secondary  
483 antibodies (room temperature, 1 h). Detection was performed using Clarity Western ECL  
484 Substrate (Bio-Rad). Chemidoc Touch System (Bio-Rad) was used for image acquisitions.  
485 ImageJ software was used for the densitometric analysis. Experiments were repeated three  
486 times.

#### 487 **Statistical analysis**



488 Statistics were calculated using GraphPad Prism 6 (GraphPad, San Diego, CA, USA). Used  
489 tests are shown in Figures. Overlap between DEG sets was analyzed using the hypergeometric  
490 distribution calculator ([http://nemates.org/MA/progs/overlap\\_stats.html/](http://nemates.org/MA/progs/overlap_stats.html/)).

491

## 492 REFERENCES

- 493 1. Sung H, Ferlay J, Siegel RL, Laversanne M, Soerjomataram I, Jemal A, *et al.* Global Cancer  
494 Statistics 2020: GLOBOCAN Estimates of Incidence and Mortality Worldwide for 36 Cancers  
495 in 185 Countries. *CA Cancer J Clin* 2021;71: 209-49.
- 496 2. Cabanillas ME, McFadden DG, Durante C. Thyroid cancer. *Lancet* 2016;388: 2783-95.
- 497 3. Amundadottir LT, Thorvaldsson S, Gudbjartsson DF, Sulem P, Kristjansson K, Arnason S,  
498 *et al.* Cancer as a Complex Phenotype: Pattern of Cancer Distribution within and beyond the  
499 Nuclear Family. *PLoS Med* 2005;1: e65.
- 500 4. Czene K, Lichtenstein P, Hemminki K. Environmental and heritable causes of cancer among  
501 9.6 million individuals in the Swedish family-cancer database. *Int J Cancer* 2002;99: 260-6.
- 502 5. Oakley GM, Curtin K, Pimentel R, Buchmann L, Hunt J. Establishing a familial basis for  
503 papillary thyroid carcinoma using the Utah Population Database. *JAMA Otolaryngol Head*  
504 *Neck Surg* 2013;139: 1171-4.
- 505 6. Rashkin SR, Graff RE, Kachuri L, Thai KK, Alexeeff SE, Blatchins MA, *et al.* Pan-cancer  
506 study detects genetic risk variants and shared genetic basis in two large cohorts. *Nat Commun*  
507 2020;11: 4423.
- 508 7. Gudmundsson J, Sulem P, Gudbjartsson DF, Jonasson JG, Masson G, He H, *et al.* Discovery  
509 of common variants associated with low TSH levels and thyroid cancer risk. *Nat Genet*  
510 2012;44: 319-22.
- 511 8. Gudmundsson J, Thorleifsson G, Sigurdsson JK, Stefansdottir L, Jonasson JG, Gudjonsson  
512 SA, *et al.* A genome-wide association study yields five novel thyroid cancer risk loci. *Nat*  
513 *Commun* 2017;8: 14517.
- 514 9. Köhler A, Chen B, Gemignani F, Elisei R, Romei C, Figlioli G, *et al.* Genome-wide  
515 association study on differentiated thyroid cancer. *J Clin Endocrinol Metab* 2013;98: E1674-  
516 81.
- 517 10. Saenko VA, Rogounovitch TI. Genetic Polymorphism Predisposing to Differentiated  
518 Thyroid Cancer: A Review of Major Findings of the Genome-Wide Association Studies.  
519 *Endocrinol Metab (Seoul)* 2018;33: 164-74.

- 520 11. Takahashi M, Saenko VA, Rogounovitch TI, Kawaguchi T, Drozd VM, Takigawa-Imamura  
521 H, *et al.* The FOXE1 locus is a major genetic determinant for radiation-related thyroid  
522 carcinoma in Chernobyl. *Hum Mol Genet* 2010;19: 2516-23.
- 523 12. Liyanarachchi S, Wojcicka A, Li W, Czetwertynska M, Stachlewska E, Nagy R, *et al.*  
524 Cumulative risk impact of five genetic variants associated with papillary thyroid carcinoma.  
525 *Thyroid* 2013;23: 1532-40.
- 526 13. Son HY, Hwangbo Y, Yoo SK, Im SW, Yang SD, Kwak SJ, *et al.* Genome-wide association  
527 and expression quantitative trait loci studies identify multiple susceptibility loci for thyroid  
528 cancer. *Nat Commun* 2017;8: 15966.
- 529 14. Guibon J, Sugier PE, Kulkarni O, Karimi M, Bacq-Daian D, Besse C, *et al.* Fine-mapping  
530 of two differentiated thyroid carcinoma susceptibility loci at 2q35 and 8p12 in Europeans,  
531 Melanesians and Polynesians. *Oncotarget* 2021;12: 493-506.
- 532 15. Świerniak M, Wójcicka A, Czetwertyńska M, Długosińska J, Stachlewska E, Gierlikowski  
533 W, *et al.* Association between GWAS-Derived rs966423 Genetic Variant and Overall Mortality  
534 in Patients with Differentiated Thyroid Cancer. *Clin Cancer Res* 2016;22: 1111-9.
- 535 16. Lonsdale J, Thomas J, Salvatore M, Phillips R, Lo E, Shad S, *et al.* The Genotype-Tissue  
536 Expression (GTEx) project. *Nat Genet* 2013;45: 580-5.
- 537 17. Cancer Genome Atlas Research N. Integrated genomic characterization of papillary thyroid  
538 carcinoma. *Cell* 2014;159: 676-90.
- 539 18. Michailidou K, Hall P, Gonzalez-Neira A, Ghoussaini M, Dennis J, Milne RL, *et al.* Large-  
540 scale genotyping identifies 41 new loci associated with breast cancer risk. *Nat Genet* 2013;45:  
541 353-61, 61e1-2.
- 542 19. Fachal L, Aschard H, Beesley J, Barnes DR, Allen J, Kar S, *et al.* Fine-mapping of 150  
543 breast cancer risk regions identifies 191 likely target genes. *Nat Genet* 2020;52: 56-73.
- 544 20. Ye M, Dong S, Hou H, Zhang T, Shen M. Oncogenic Role of Long Noncoding RNA  
545 MALAT1 in Thyroid Cancer Progression through Regulation of the miR-204/IGF2BP2/m6A-  
546 MYC Signaling. *Mol Ther Nucleic Acids* 2021;23: 1-12.
- 547 21. Ito Y, Kobayashi T, Takeda T, Komoike Y, Wakasugi E, Tamaki Y, *et al.* Expression of  
548 p21 (WAF1/CIP1) protein in clinical thyroid tissues. *Br J Cancer* 1996;74: 1269-74.
- 549 22. Bumber B, Marjanovic Kavanagh M, Jakovcevic A, Sincic N, Prstacic R, Prgomet D. Role  
550 of matrix metalloproteinases and their inhibitors in the development of cervical metastases in  
551 papillary thyroid cancer. *Clin Otolaryngol* 2020;45: 55-62.

- 552 23. Argente J, Chowen JA, Pérez-Jurado LA, Frystyk J, Oxvig C. One level up: abnormal  
553 proteolytic regulation of IGF activity plays a role in human pathophysiology. *EMBO Mol Med*  
554 2017;9: 1338-45.
- 555 24. Dai D, Wang Q, Li X, Liu J, Ma X, Xu W. Klotho inhibits human follicular thyroid cancer  
556 cell growth and promotes apoptosis through regulation of the expression of stanniocalcin-1.  
557 *Oncol Rep* 2016;35: 552-8.
- 558 25. Bodmer D, Schepens M, Eleveld MJ, Schoenmakers EF, Geurts van Kessel A. Disruption  
559 of a novel gene, DIRC3, and expression of DIRC3-HSPBAP1 fusion transcripts in a case of  
560 familial renal cell cancer and t(2;3)(q35;q21). *Genes Chromosomes Cancer* 2003;38: 107-16.
- 561 26. Wyszynski A, Hong CC, Lam K, Michailidou K, Lytle C, Yao S, *et al.* An intergenic risk  
562 locus containing an enhancer deletion in 2q35 modulates breast cancer risk by deregulating  
563 IGFBP5 expression. *Hum Mol Genet* 2016;25: 3863-76.
- 564 27. Ghousaini M, Edwards SL, Michailidou K, Nord S, Cowper-Sal Lari R, Desai K, *et al.*  
565 Evidence that breast cancer risk at the 2q35 locus is mediated through IGFBP5 regulation. *Nat*  
566 *Commun* 2014;4: 4999.
- 567 28. Sakaue S, Kanai M, Tanigawa Y, Karjalainen J, Kurki M, Koshihara S, *et al.* A cross-  
568 population atlas of genetic associations for 220 human phenotypes. *Nat Genet* 2021;53: 1415-  
569 24.
- 570 29. Truong T, Lesueur F, Sugier PE, Guibon J, Xhaard C, Karimi M, *et al.* Multiethnic genome-  
571 wide association study of differentiated thyroid cancer in the EPITHYR consortium. *Int J*  
572 *Cancer* 2021;148: 2935-46.
- 573 30. Coe EA, Tan JY, Shapiro M, Louphrasitthiphol P, Bassett AR, Marques AC, *et al.* The  
574 MITF-SOX10 regulated long non-coding RNA DIRC3 is a melanoma tumour suppressor. *PLoS*  
575 *Genet* 2019;15: e1008501.
- 576 31. Coe EA. Identification and characterisation of MITF-regulated long non-coding RNA  
577 candidate regulators of melanoma. *PhD thesis*, University of Bath (UK) 2020.
- 578 32. Wang J, Ding N, Li Y, Cheng H, Wang D, Yang Q, *et al.* Insulin-like growth factor binding  
579 protein 5 (IGFBP5) functions as a tumor suppressor in human melanoma cells. *Oncotarget*  
580 2015;6: 20636-49.
- 581 33. Manzella L, Massimino M, Stella S, Tirrò E, Pennisi MS, Martorana F, *et al.* Activation of  
582 the IGF Axis in Thyroid Cancer: Implications for Tumorigenesis and Treatment. *Int J Mol Sci*  
583 2019;20: 3258.
- 584 34. Zaballos MA, Santisteban P. FOXO1 controls thyroid cell proliferation in response to TSH  
585 and IGF-I and is involved in thyroid tumorigenesis. *Mol Endocrinol* 2013;27: 50-62.

- 586 35. Knuppel A, Fensom GK, Watts EL, Gunter MJ, Murphy N, Papier K, *et al.* Circulating  
587 Insulin-like Growth Factor-I Concentrations and Risk of 30 Cancers: Prospective Analyses in  
588 UK Biobank. *Cancer Res* 2020;80: 4014-21.
- 589 36. Lango Allen H, Estrada K, Lettre G, Berndt SI, Weedon MN, Rivadeneira F, *et al.* Hundreds  
590 of variants clustered in genomic loci and biological pathways affect human height. *Nature*  
591 2010;467: 832-8.
- 592 37. Wood AR, Esko T, Yang J, Vedantam S, Pers TH, Gustafsson S, *et al.* Defining the role of  
593 common variation in the genomic and biological architecture of adult human height. *Nat Genet*  
594 2014;46: 1173-86.
- 595 38. Kitahara CM, Gamborg M, Berrington de González A, Sørensen TIA, Baker JL. Childhood  
596 Height and Body Mass Index Were Associated with Risk of Adult Thyroid Cancer in a Large  
597 Cohort Study. *Cancer Res* 2014;74: 235-42.
- 598 39. Jing Z, Hou X, Liu Y, Yan S, Wang R, Zhao S, *et al.* Association between height and thyroid  
599 cancer risk: A meta-analysis of prospective cohort studies. *Int J Cancer* 2015;137: 1484-90.
- 600 40. Duan C, Allard JB. Insulin-Like Growth Factor Binding Protein-5 in Physiology and  
601 Disease. *Front Endocrinol (Lausanne)* 2020;11: 100.
- 602 41. Liu L, Wang J, Li X, Ma J, Shi C, Zhu H, *et al.* MiR-204-5p suppresses cell proliferation  
603 by inhibiting IGFBP5 in papillary thyroid carcinoma. *Biochem Biophys Res Commun* 2015;457:  
604 621-6.
- 605 42. Liu H, Li R, Guan L, Jiang T. Knockdown of lncRNA UCA1 inhibits proliferation and  
606 invasion of papillary thyroid carcinoma through regulating miR-204/IGFBP5 axis. *Onco*  
607 *Targets Ther* 2018;11: 7197-204.
- 608 43. Iams WT, Lovly CM. Molecular Pathways: Clinical Applications and Future Direction of  
609 Insulin-like Growth Factor-1 Receptor Pathway Blockade. *Clin Cancer Res* 2015;21: 4270-7.
- 610 44. Dolgin E. IGF-1R drugs travel from cancer cradle to Graves'. *Nat Biotechnol* 2020;38: 385-  
611 8.
- 612 45. Pavlicek A, Lira ME, Lee NV, Ching KA, Ye J, Cao J, *et al.* Molecular predictors of  
613 sensitivity to the insulin-like growth factor 1 receptor inhibitor Figitumumab (CP-751,871).  
614 *Mol Cancer Ther* 2013;12: 2929-39.
- 615 46. Neuzillet Y, Chapeaublanc E, Krucker C, De Koning L, Lebret T, Radvanyi F, *et al.* IGF1R  
616 activation and the in vitro antiproliferative efficacy of IGF1R inhibitor are inversely correlated  
617 with IGFBP5 expression in bladder cancer. *BMC Cancer* 2017;17: 636.

618 47. Becker MA, Hou X, Harrington SC, Weroha SJ, Gonzalez SE, Jacob KA, *et al.* IGFBP ratio  
619 confers resistance to IGF targeting and correlates with increased invasion and poor outcome in  
620 breast tumors. *Clin Cancer Res* 2012;18: 1808-17.

621 48. Humphrey J, Birsa N, Milioto C, McLaughlin M, Ule AM, Robaldo D, *et al.* FUS ALS-  
622 causative mutations impair FUS autoregulation and splicing factor networks through intron  
623 retention. *Nucleic Acids Res* 2020;48: 6889-905.

624 49. Love MI, Huber W, Anders S. Moderated estimation of fold change and dispersion for  
625 RNA-seq data with DESeq2. *Genome Biol* 2014;15: 550.

626 50. Subhash S, Kanduri C. GeneSCF: a real-time based functional enrichment tool with support  
627 for multiple organisms. *BMC Bioinformatics* 2016;17: 365.

628

## 629 **FIGURE LEGENDS**

630 **Figure 1. *DIRC3* expression in PTCs in TCGA. (A).** Expression of *DIRC3* in malignancies  
631 profiled in TCGA project. Data for PTCs (THCA) is marked with a red arrow (graph generated  
632 in the Firehose portal, <http://firebrowse.org/>, accessed 05/2018). **(B).** Oncoprint graph  
633 illustrating the relationship between *DIRC3* expression and the disease-free status in PTCs. The  
634 best fitting threshold value of gene expression used to discriminate the disease-free status is  
635 marked with a green line. **(C).** Disease-free survival of PTC patients according to the *DIRC3*  
636 expression status. **(D).** Correlation between the expression of *DIRC3* and *IGFBP5* in PTCs in  
637 TCGA. Graphs were prepared using cBioPortal (<https://www.cbioportal.org/>; 05/2018).  
638 Abbreviation: RSEM, RNA-Seq by Expectation-Maximization.

639

640 **Figure 2. *DIRC3* expression in thyroid tissue. (A).** Expression of *DIRC3* in DTCs and normal  
641 thyroid tissue (Tukey plot; pair-matched Wilcoxon test). **(B).** Correlation between the  
642 expression of *DIRC3* and *IGFBP5* in DTCs. Gene co-expression in normal thyroid tissue  
643 (Spearman coefficient = 0.77,  $p < 0.001$ ) is not shown. **(C).** Relationship between *DIRC3*  
644 expression in cancer and the clinicopathological features of DTCs (analyzed with Kruskal-  
645 Wallis and Mann–Whitney U tests). Abbreviations: cPTC: conventional PTC; fvPTC follicular  
646 variant PTC; FTC: follicular thyroid cancer; HTC: Hürthle cell thyroid carcinoma.

647

648 **Figure 3. Expression and silencing of *DIRC3* in cancer cell lines. (A).** Gene expression  
649 (*DIRC3* total, *DIRC3* splice variants, and *IGFBP5*) in cell lines. *DIRC3-204* was not detected  
650 in any cell line (not shown). **(B).** Subcellular localization of *DIRC3* and control (*MALAT1* and  
651 *SNHG5*) lncRNAs. Enrichment of transcripts in the subcellular fractions is expressed as  $\Delta$ Ct  
652 between the cytoplasmic and nuclear RNA fractions. **(C).** Effect of *DIRC3* silencing in MDA-  
653 T32 and MCF-7 cells on the expression of *DIRC3* (total and splice variants) and *IGFBP5*. \*  
654 indicates  $p < 0.05$  vs. negative control (n = 3; mean  $\pm$  SD; ANOVA).

655

656 **Figure 4. Phenotypic effect of *DIRC3* silencing in MDA-T32 and MDA-T120 cell lines. (A).**  
657 Results of MTT assays after GapmeR transfections. \* indicates  $p < 0.05$  vs. negative control (n  
658 = 3 with technical quadruplicates; mean  $\pm$  SD; ANOVA). **(B).** Representative images of the  
659 GapmeR-transfected MDA-T32 cells in Transwell assays. **(C).** Quantification of migration and  
660 invasiveness in MDA-T32 and MDA-T120 cells after silencing of *DIRC3* (n = 3; mean  $\pm$  SD;  
661 t-test). **(D).** Quantification of the chemotactic effect of IGF-1 in *DIRC3*-depleted MDA-T32  
662 cells (n = 3; mean  $\pm$  SD; t-test). **(E).** Activity of caspase 3/7 after GapmeR transfections in  
663 serum- and glutamine-starved MDA-T32 and MDA-T120 cells (n = 6; mean  $\pm$  SD; t-test). **(F).**  
664 Number of visible colonies per well in soft agar assays after transfection of MDA-T32 cell with  
665 the *DIRC3*-silencing and negative control GapmeRs (n = 9; mean  $\pm$  SD; t-test). Abbreviations:  
666 FOV, field of view; ns: not significant; OD, optical density.

667

668 **Figure 5. *IGFBP5*-rescue experiments in MDA-T32 cells transfected with the *DIRC3*-**  
669 **targeting GapmeRs. (A).** Expression of *DIRC3* (total and *DIRC3-203*) and *IGFBP5* in MDA-  
670 T32 cells with stable expression of pcDNA3-IGFBP5-V5 (abbreviated as “BP5”) or control  
671 (“empty”) pcDNA3 plasmids, transfected with GapmeRs (n = 3; mean  $\pm$  SD; t-test). **(B).** Results  
672 of MTT assays in the plasmid-expressing MDA-T32 cells 96 hours after transfections of  
673 GapmeRs (n = 3 with technical quadruplicates; mean  $\pm$  SD; ANOVA vs. control). **(C).**  
674 Representative fields of view (FOV) in Transwell assays of the plasmid-expressing and  
675 GapmeR-transfected MDA-T32 cells. **(D).** Quantification of migration of the plasmid-  
676 expressing MDA-T32 cells after transfections of GapmeRs (n = 3; mean  $\pm$  SD, t-test). \*  
677 indicates  $p < 0.05$  vs control. ns: not significant.

678

679 **Figure 6. Influence of *DIRC3* and *IGFBP5* downregulations on the transcriptome and**  
680 **IGF-1R/AKT signaling in MDA-T32 cells. (A).** Bi-clustering heatmaps of top 30 *DIRC3*- and  
681 *IGFBP5*-altered DEGs (log<sub>2</sub> transformed values; sorted by adjusted p-values). **(B).** Overlap  
682 between DEGs in the *DIRC3*- and *IGFBP5*-silenced samples (n = 3). Arrows indicate up- or  
683 down-regulation. **(C).** Top gene ontology (GO) terms enriched in MDA-T32 cells after  
684 silencing of *DIRC3*. **(D).** Immunoblot of IGFBP5 in the conditioned media and MDA-T32 cells  
685 transfected with GapmeRs (cultured with 20 ng/ml of IGF-1, 24 h). **(E).** Immunoblots of MDA-  
686 T32 cells transfected with GapmeRs and stimulated for 10 mins with previously harvested  
687 conditioned media. The conditioned media were applied in 3 versions: a) unmodified (i.e. with  
688 IGF-1 20 ng/ml), b) supplemented with additional 30 ng/ml of IGF-1, or c) supplemented with  
689 IGFBP5 (500 ng/ml). **(F).** Relative abundance of pAKT in three independent blots (mean ± SD  
690 of semi-quantitative densitometric units; ANOVA). \* indicates p < 0.05 vs. “neg. ctr. + cond.  
691 medium”.

692

693

694

695

696

697

698

699

700

701

702

703

704

705

706

707 **Acknowledgement:** We would like to express our deepest gratitude to Prof. Krystian  
708 Jazdzewski for sponsoring the project, providing necessary resources and facilities without  
709 which it would not have been possible to complete this study. This work was supported by  
710 grants from the National Science Centre, Poland (Preludium grant no. 2017/27/N/NZ2/03116  
711 to P.T.W.), Medical University of Warsaw, Poland (The Young Investigator Grant no.  
712 MB/M/12(26) to P.T.W), and Polish Ministry of Education and Science (Regional Initiative for  
713 Excellence grant no. 013/RID/2018/19).

714

715 **Author Contributions:** P.T.W. conceived the project, designed and performed experiments,  
716 collected data, performed the analysis, and wrote the manuscript. K.C. performed experiments,  
717 collected data, and corrected the manuscript. A.A.M. helped to design experiments, contributed  
718 analytic tools, and corrected the manuscript. M.K. participated in the project design, contributed  
719 analytic tools, and provided methodological support. D.N. supervised the project, helped to  
720 design experiments, contributed analytic tools, and corrected the manuscript.

721

722 **Conflict of Interest:** The authors declare no conflicts of interest.

723

724 **Data Availability Statement:** The RNA-Seq data generated in this study have been deposited  
725 in the Sequence Read Archive (SRA) database with the accession number PRJNA924305.  
726 Uncropped images of western blot membranes are shown in the Supplementary Figures 12 and  
727 13. The Cancer Genome Atlas data for Thyroid Carcinoma (PanCancer Atlas) has been obtained  
728 using cBioPortal for Cancer Genomics (Memorial Sloan Kettering Cancer Center, USA). User-  
729 curated dataset created during the analysis can be accessed here:  
730 [https://www.cbioportal.org/study/summary?id=thca\\_tcga\\_pan\\_can\\_atlas\\_2018#sharedGroups](https://www.cbioportal.org/study/summary?id=thca_tcga_pan_can_atlas_2018#sharedGroups=6187b26ef8f71021ce56ebdd,6187b29bf8f71021ce56ebde)  
731 [=6187b26ef8f71021ce56ebdd,6187b29bf8f71021ce56ebde](https://www.cbioportal.org/study/summary?id=thca_tcga_pan_can_atlas_2018#sharedGroups=6187b26ef8f71021ce56ebdd,6187b29bf8f71021ce56ebde). Additional primary data and  
732 materials that support the findings of this study are available upon reasonable request.

733

734 **Ethics statement:** Collection of thyroid tissue was approved by the Institutional Review Board  
735 at the Medical University of Warsaw (Approval KB/184/2009). Written informed consents were  
736 obtained from all patients.



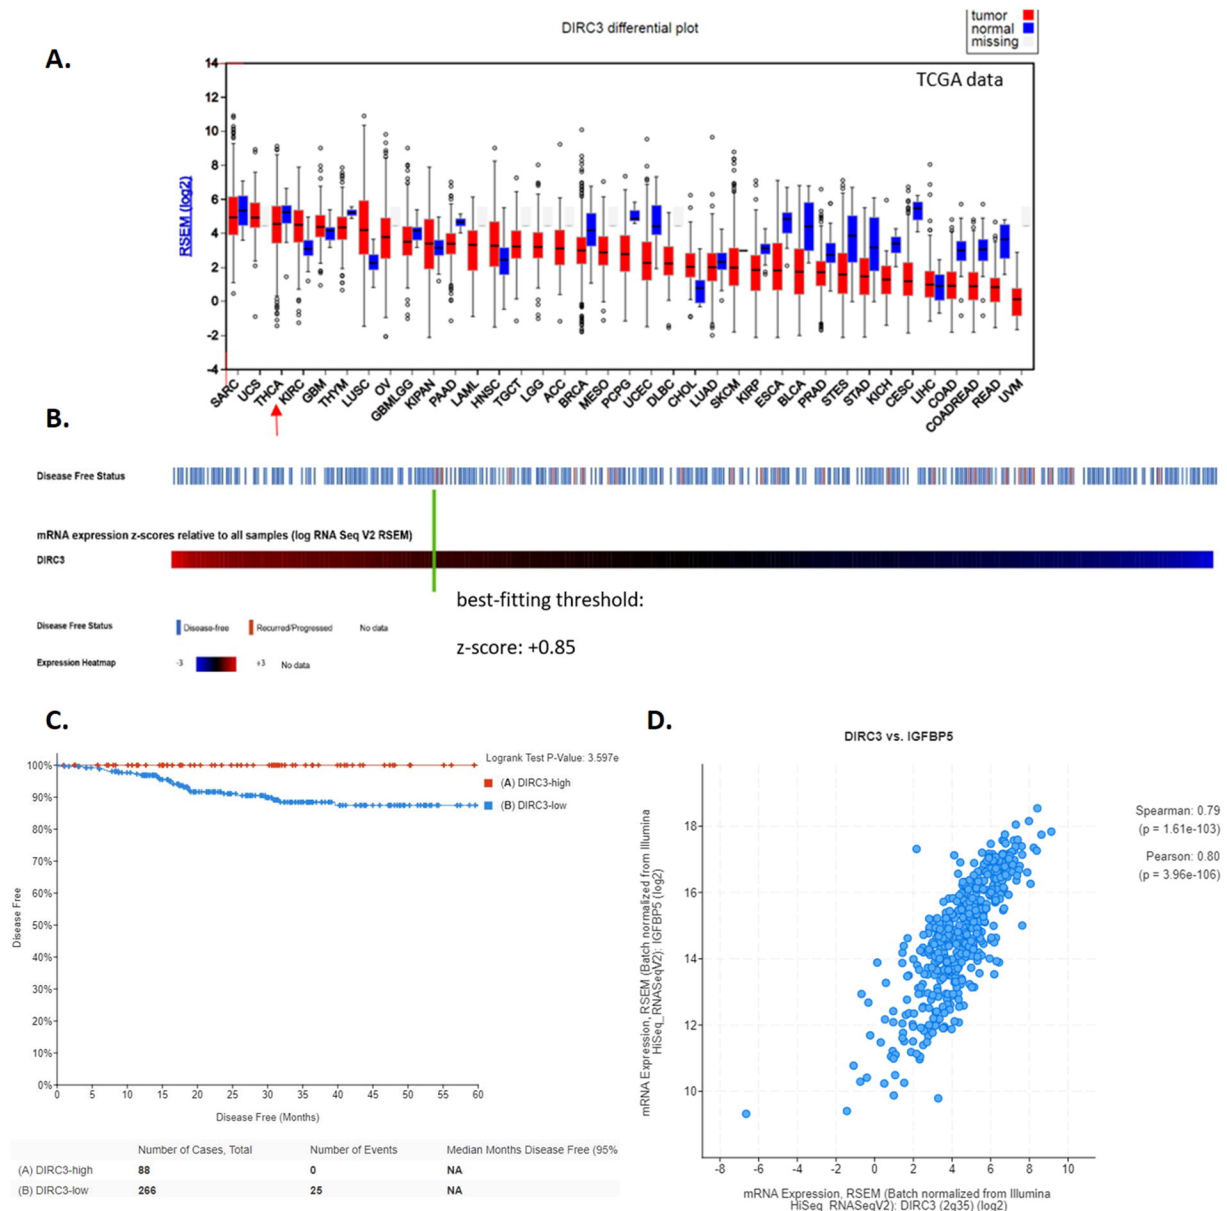

**Figure 1. *DIRC3* expression in PTCs in TCGA.** (A). Expression of *DIRC3* in malignancies profiled in TCGA project. Data for PTCs (THCA) is marked with a red arrow (graph generated in the Firehose portal, <http://firebrowse.org/>, accessed 05/2018). (B). Oncoprint graph illustrating the relationship between *DIRC3* expression and the disease-free status in PTCs. The best fitting threshold value of gene expression used to discriminate the disease-free status is marked with a green line. (C). Disease-free survival of PTC patients according to the *DIRC3* expression status. (D). Correlation between the expression of *DIRC3* and *IGFBP5* in PTCs in TCGA. Graphs were prepared using cBioPortal (<https://www.cbioportal.org/>; 05/2018). Abbreviation: RSEM, RNA-Seq by Expectation-Maximization.

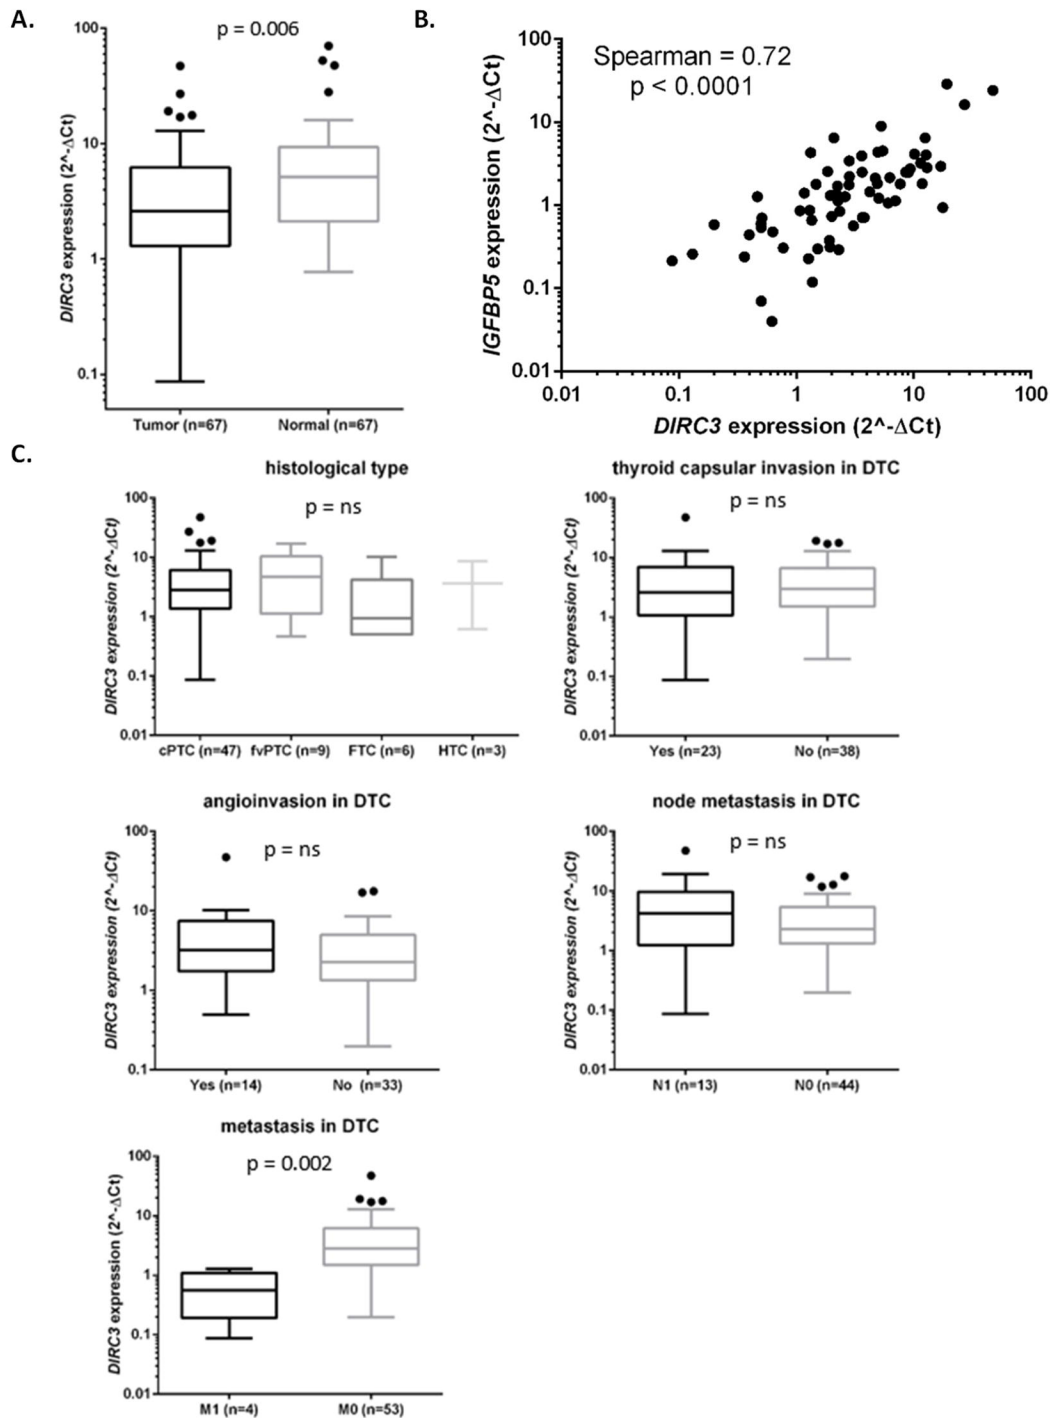

**Figure 2. *DIRC3* expression in thyroid tissue. (A).** Expression of *DIRC3* in DTCs and normal thyroid tissue (Tukey plot; pair-matched Wilcoxon test). **(B).** Correlation between the expression of *DIRC3* and *IGFBP5* in DTCs. Gene co-expression in normal thyroid tissue (Spearman coefficient = 0.77,  $p < 0.001$ ) is not shown. **(C).** Relationship between *DIRC3* expression in cancer and the clinicopathological features of DTCs (analyzed with Kruskal-Wallis and Mann-Whitney U tests). Abbreviations: cPTC: conventional PTC; fvPTC follicular variant PTC; FTC: follicular thyroid cancer; HTC: Hürthle cell thyroid carcinoma.

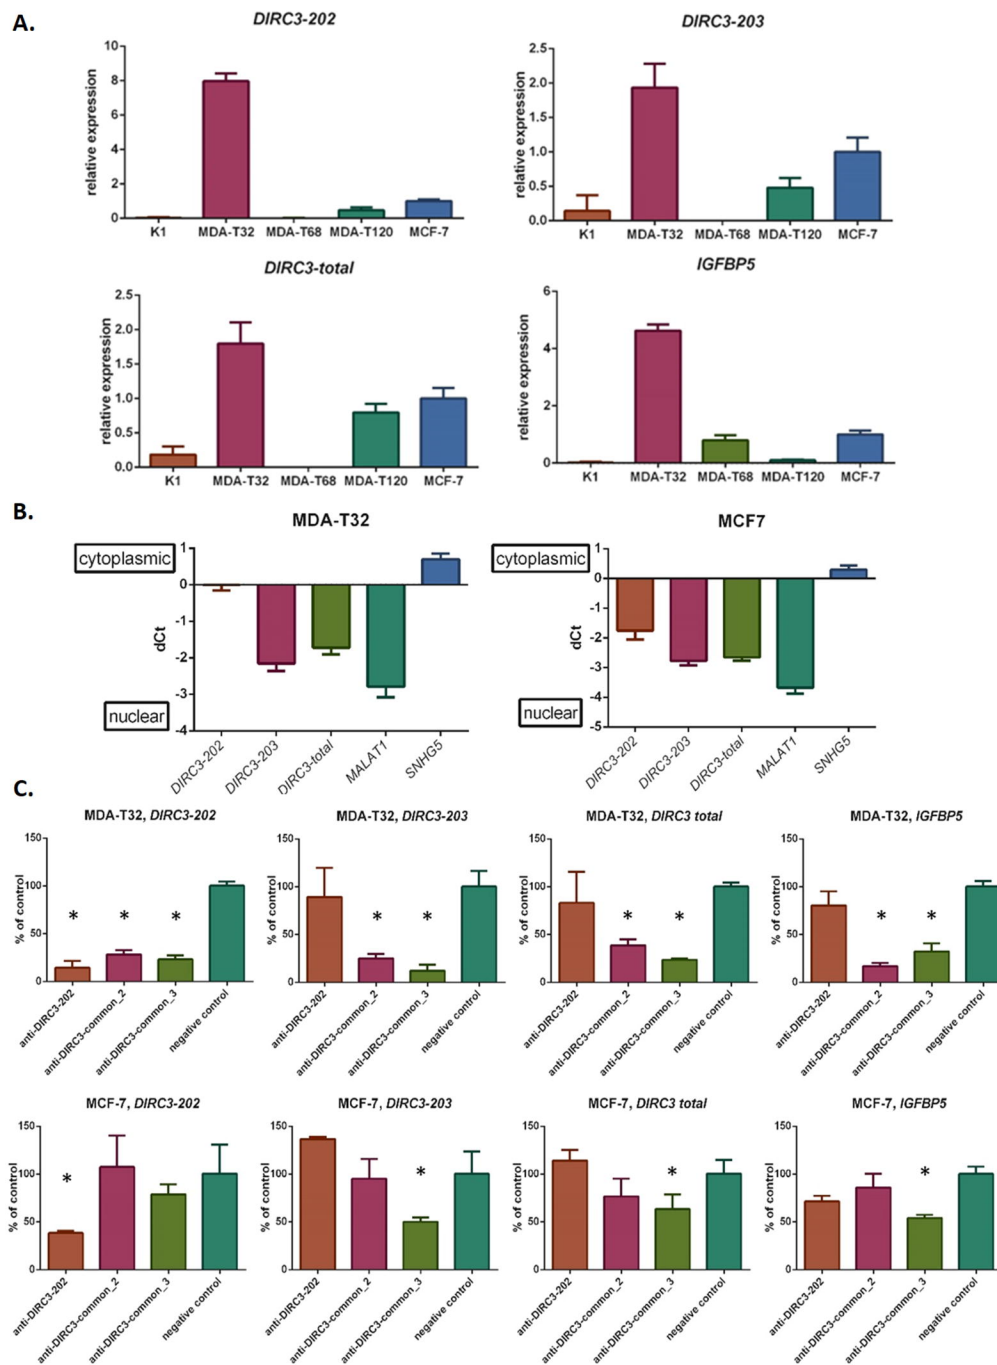

**Figure 3. Expression and silencing of *DIRC3* in cancer cell lines. (A).** Gene expression (*DIRC3* total, *DIRC3* splice variants, and *IGFBP5*) in cell lines. *DIRC3-204* was not detected in any cell line (not shown). **(B).** Subcellular localization of *DIRC3* and control (*MALAT1* and *SNHG5*) lncRNAs. Enrichment of transcripts in the subcellular fractions is expressed as  $\Delta$ Ct between the cytoplasmic and nuclear RNA fractions. **(C).** Effect of *DIRC3* silencing in MDA-T32 and MCF-7 cells on the expression of *DIRC3* (total and splice variants) and *IGFBP5*. \* indicates  $p < 0.05$  vs. negative control (n = 3; mean  $\pm$  SD; ANOVA).

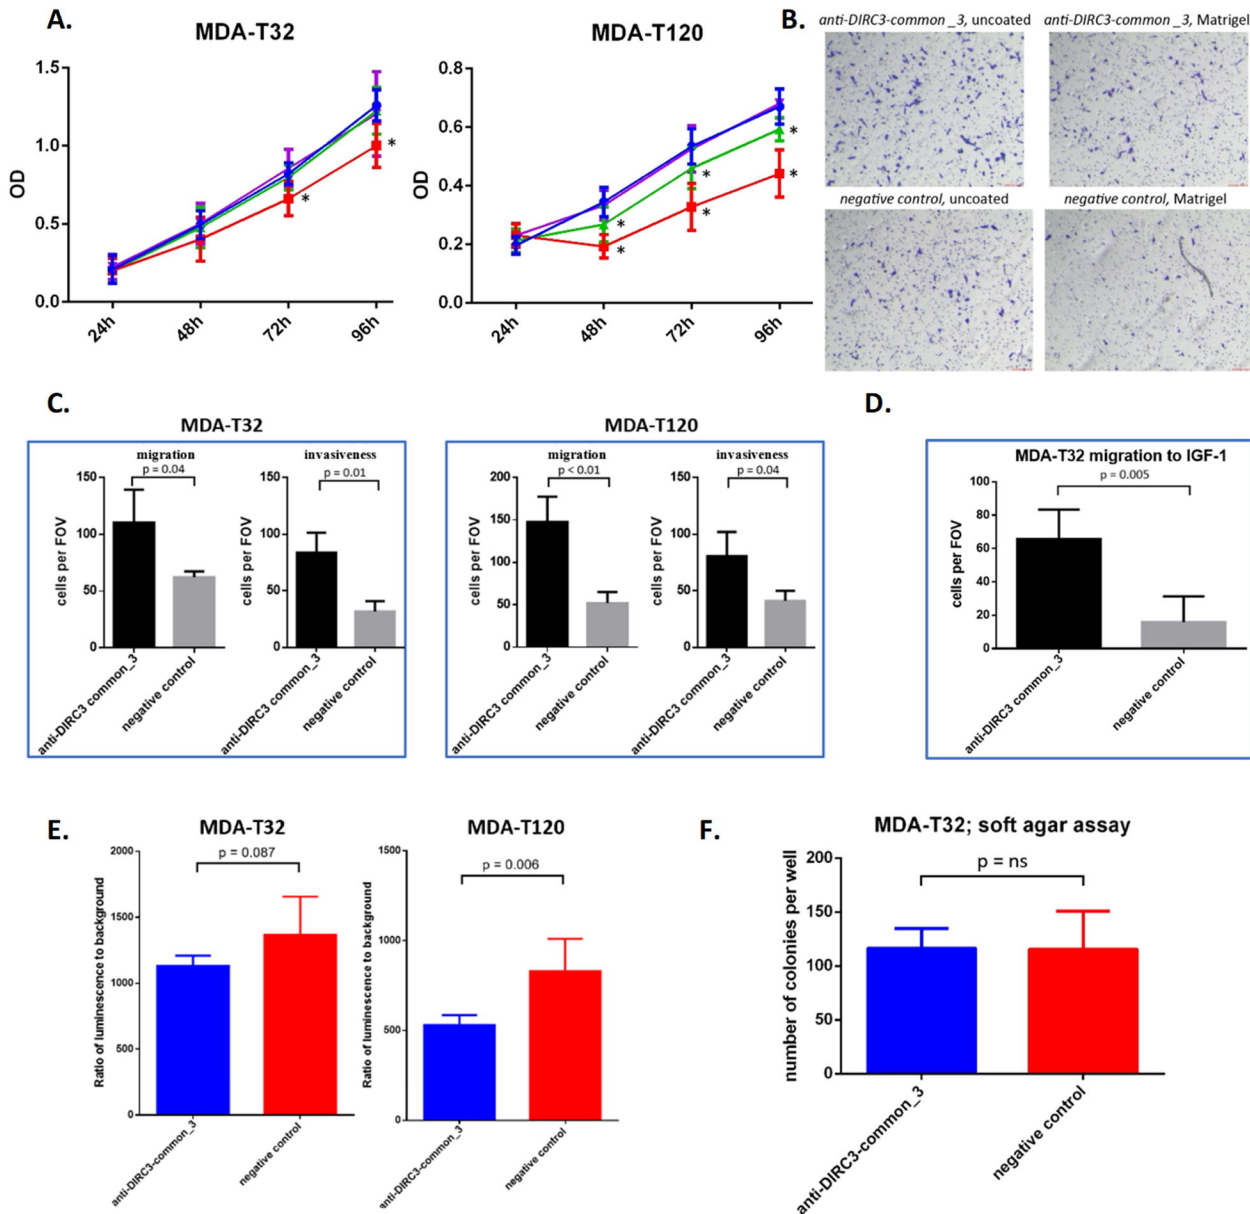

**Figure 4. Phenotypic effect of *DIRC3* silencing in MDA-T32 and MDA-T120 cell lines.**

**(A).** Results of MTT assays after GapmeR transfections. \* indicates  $p < 0.05$  vs. negative control ( $n = 3$  with technical quadruplicates; mean  $\pm$  SD; ANOVA). **(B).** Representative images of the GapmeR-transfected MDA-T32 cells in Transwell assays. **(C).** Quantification of migration and invasiveness in MDA-T32 and MDA-T120 cells after silencing of *DIRC3* ( $n = 3$ ; mean  $\pm$  SD; t-test). **(D).** Quantification of the chemotactic effect of IGF-1 in *DIRC3*-depleted MDA-T32 cells ( $n = 3$ ; mean  $\pm$  SD; t-test). **(E).** Activity of caspase 3/7 after GapmeR transfections in serum- and glutamine-starved MDA-T32 and MDA-T120 cells ( $n = 6$ ; mean  $\pm$  SD; t-test). **(F).** Number of visible colonies per well in soft agar assays after transfection of MDA-T32 cell with the *DIRC3*-silencing and negative control GapmeRs ( $n = 9$ ; mean  $\pm$  SD; t-test). Abbreviations: FOV, field of view; ns: not significant; OD, optical density.  $\pm$  SD; t-test).

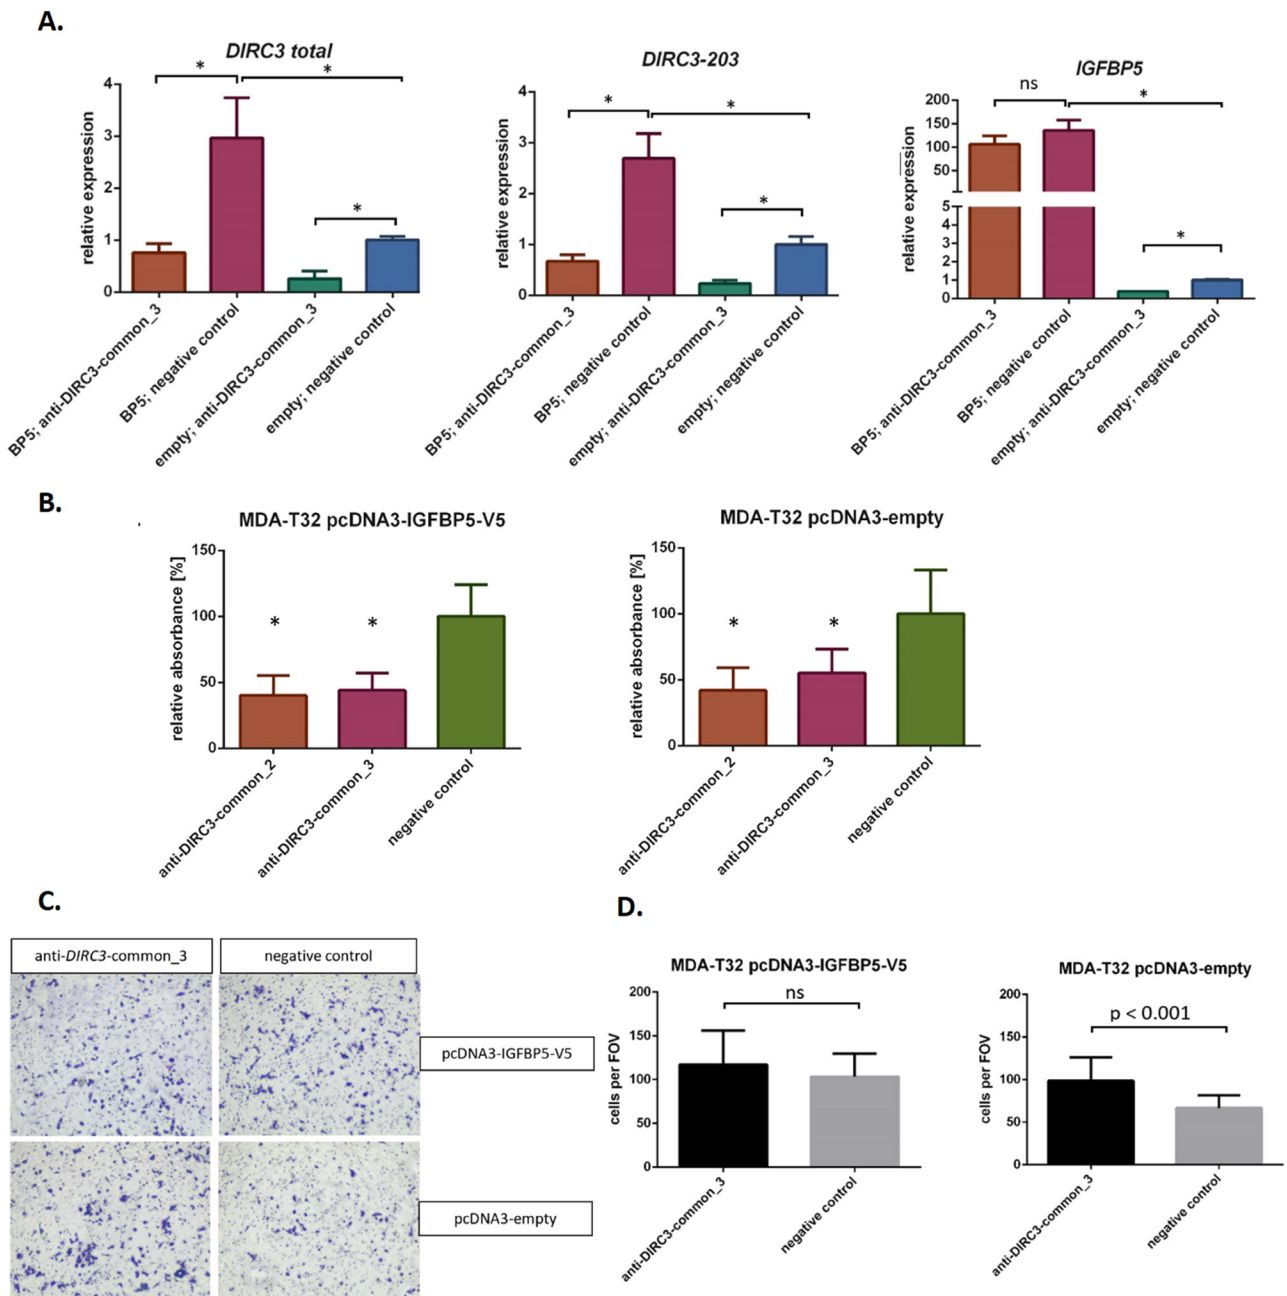

**Figure 5. IGFBP5-rescue experiments in MDA-T32 cells transfected with the *DIRC3*-targeting GapmeRs. (A).** Expression of *DIRC3* (total and *DIRC3*-203) and *IGFBP5* in MDA-T32 cells with stable expression of pcDNA3-IGFBP5-V5 (abbreviated as “BP5”) or control (“empty”) pcDNA3 plasmids, transfected with GapmeRs (n = 3; mean ± SD; t-test). **(B).** Results of MTT assays in the plasmid-expressing MDA-T32 cells 96 hours after transfections of GapmeRs (n = 3 with technical quadruplicates; mean ± SD; ANOVA vs. control). **(C).** Representative fields of view (FOV) in Transwell assays of the plasmid-expressing and GapmeR-transfected MDA-T32 cells. **(D).** Quantification of migration of the plasmid-expressing MDA-T32 cells after transfections of GapmeRs (n = 3; mean ± SD, t-test). \* indicates p < 0.05 vs control. ns: not significant.

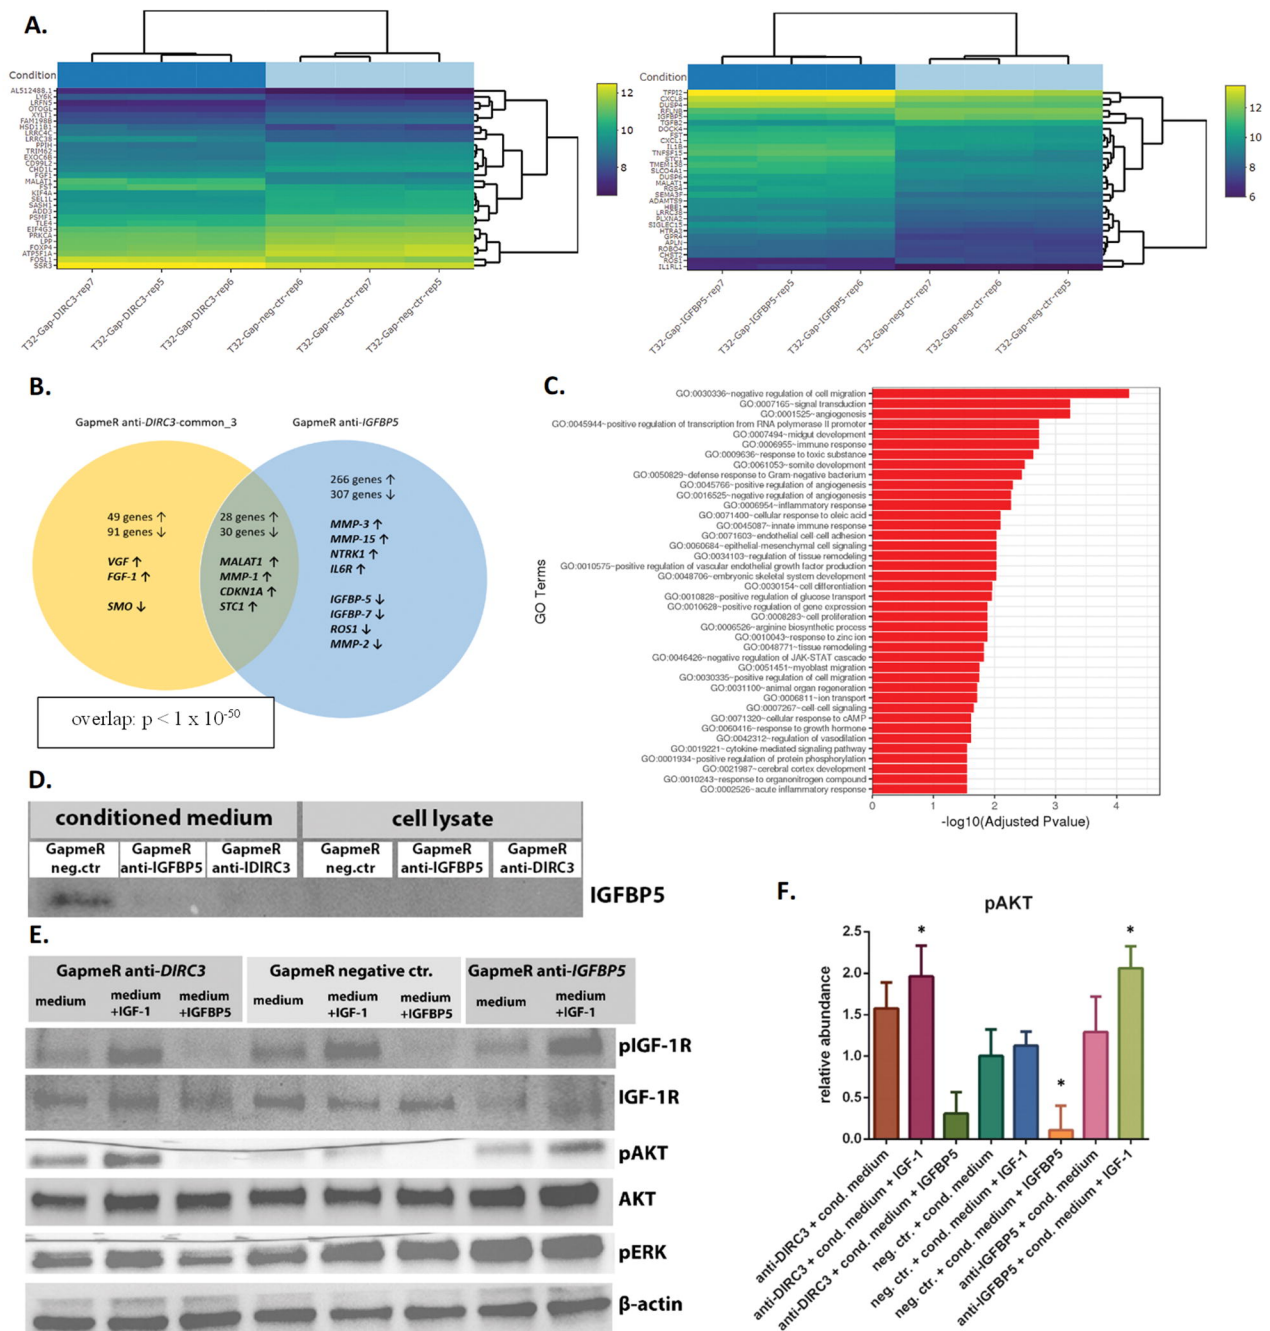

**Figure 6. Influence of *DIRC3* and *IGFBP5* downregulations on the transcriptome and IGF-1R/AKT signaling in MDA-T32 cells. (A).** Bi-clustering heatmaps of top 30 *DIRC3*- and *IGFBP5*-altered DEGs (log<sub>2</sub> transformed values; sorted by adjusted p-values). **(B).** Overlap between DEGs in the *DIRC3*- and *IGFBP5*-silenced samples (n = 3). Arrows indicate up- or down-regulation. **(C).** Top gene ontology (GO) terms enriched in MDA-T32 cells after silencing of *DIRC3*. **(D).** Immunoblot of *IGFBP5* in the conditioned media and MDA-T32 cells transfected with GapmeRs (cultured with 20 ng/ml of IGF-1, 24 h). **(E).** Immunoblots of MDA-T32 cells transfected with GapmeRs and stimulated for 10 mins with previously harvested conditioned media. The conditioned media were applied in 3 versions: a) unmodified (i.e. with IGF-1 20 ng/ml), b) supplemented with additional 30 ng/ml of IGF-1, or c) supplemented with IGFBP5 (500 ng/ml). **(F).** Relative abundance of pAKT in three independent blots (mean ± SD of semi-quantitative densitometric units; ANOVA). \* indicates p < 0.05 vs. “neg. ctr. + cond. medium”.
